# Supplementary material for: Prevalence of Fascioliasis and Associated Economic Losses in Cattle Slaughtered at Lira Municipality Abattoir in Northern Uganda
Source: Animals (Basel). 2021 Mar 4;11(3):681. doi: 10.3390/ani11030681 (PMC7999142; doi:10.3390/ani11030681)
Supplement: Supplementary file 1 [file animals-11-00681-s001.pdf]

**Supplementary Table 1.** The financial losses associated with liver condemnation from 142 cows due to fascioliasis in cattle slaughtered at Lira municipality abattoir in Northern Uganda over 14 days.

| Kilogram of liver trimmed off | Frequency (n) | Unit monetary loss (UGX) <sup>a</sup> | Total loss (UGX) |
|-------------------------------|---------------|---------------------------------------|------------------|
| 0                             | 75            | 0                                     | 0                |
| 0.3                           | 6             | 3,000                                 | 18,000           |
| 0.4                           | 8             | 4,000                                 | 32,000           |
| 0.5                           | 25            | 5,000                                 | 125,000          |
| 0.6                           | 12            | 6,000                                 | 72,000           |
| 0.7                           | 11            | 7,000                                 | 77,000           |
| 0.8                           | 8             | 8,000                                 | 64,000           |
| 0.9                           | 11            | 9,000                                 | 99,000           |
| 1.0                           | 13            | 10,000                                | 130,000          |
| 1.1                           | 5             | 11,000                                | 55,000           |
| 1.2                           | 3             | 12,000                                | 36,000           |
| 1.3                           | 6             | 13,000                                | 78,000           |
| 1.4                           | 2             | 14,000                                | 28,000           |
| 1.5                           | 11            | 15,000                                | 165,000          |
| 1.6                           | 3             | 16,000                                | 48,000           |
| 1.7                           | 2             | 17,000                                | 34,000           |
| 1.8                           | 1             | 18,000                                | 18,000           |
| 1.9                           | 3             | 19,000                                | 57,000           |
| 2.1                           | 1             | 21,000                                | 21,000           |
| 2.3                           | 1             | 23,000                                | 23,000           |
| 2.4                           | 1             | 24,000                                | 24,000           |
| 2.5                           | 1             | 25,000                                | 25,000           |
| 2.8                           | 2             | 28,000                                | 56,000           |
| 3.0                           | 2             | 30,000                                | 60,000           |
| 3.1                           | 2             | 31,000                                | 62,000           |
| 5.0                           | 1             | 50,000                                | 50,000           |
| Estimated financial loss      |               |                                       | 1,457,000        |

<sup>a</sup>UGX= Ugandan Shillings (one UGX= 0.00027 USD)
